# Supplementary material
Source: PubMed Central journal article supplement (PMC1361614)
Supplement: nar_34_3_949__1.pdf [file nar_34_3_949__1.pdf]

## SUPPLEMENTARY MATERIAL

### Formation of the G-quadruplex and i-motif Structures in Retinoblastoma Susceptibility Genes (Rb)

Yan Xu and Hiroshi Sugiyama\*

Department of Chemistry, Graduate School of Science, Kyoto University, Kitashirakawa-Oiwakecho, Sakyo, Kyoto, 606-8502, Japan.

E-mail: [hs@kuchem.kyoto-u.ac.jp](mailto:hs@kuchem.kyoto-u.ac.jp)

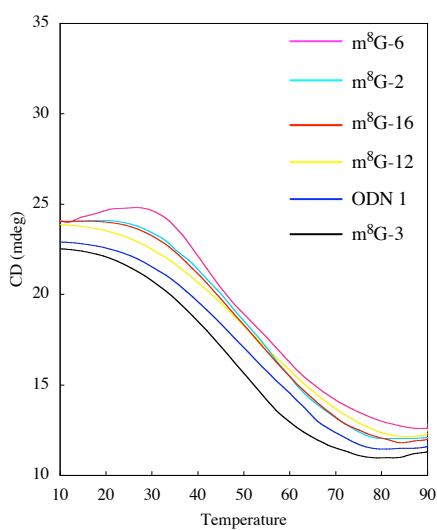

Figure 1S. CD melting curves for oligonucleotides monitored at 295 nm. The numbers indicate the position of m<sup>8</sup>G at ODN 1; m<sup>8</sup>G-2 (ODN 2), m<sup>8</sup>G-6 (ODN 4), m<sup>8</sup>G-12 (ODN 5), and m<sup>8</sup>G-16 (ODN 6) for the *syn* position, m<sup>8</sup>G-3 (ODN 3) for the *anti* position.

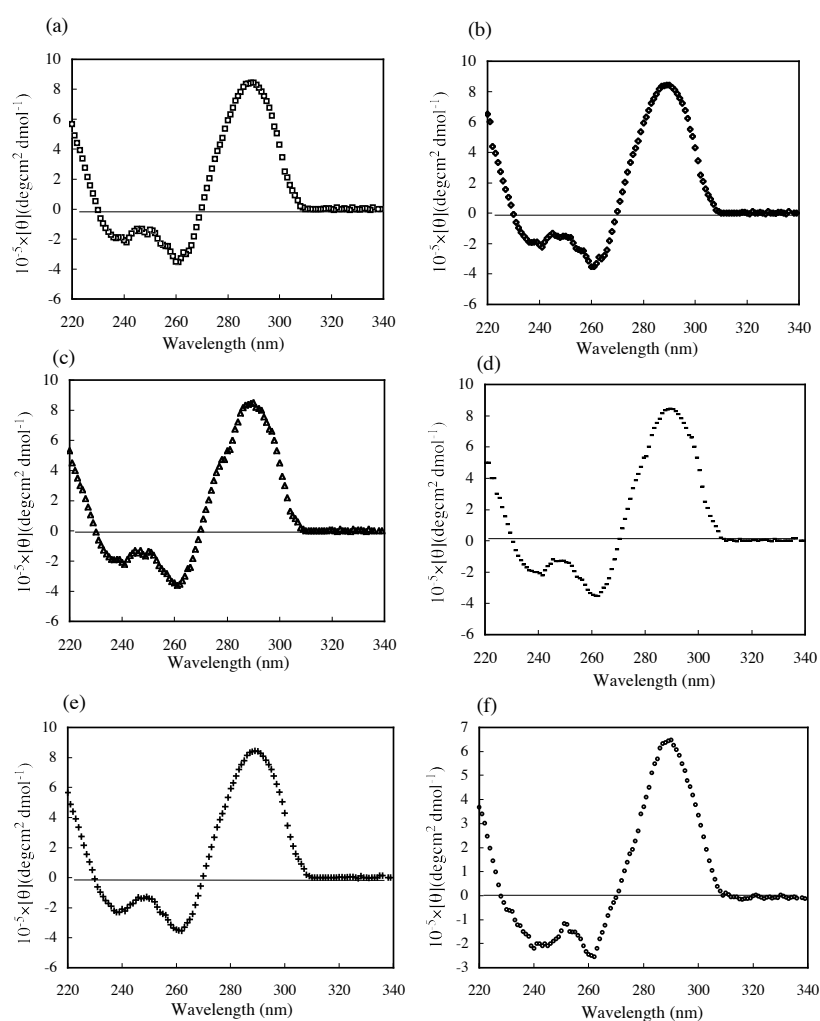

Figure 2S. CD spectra of 5'-d[CGGGGGGTTTTGGGCGGC]-3' (a); 5'-d[C(m<sup>8</sup>G)GGGGTTTTGGGCGGC]-3' (b); 5'-d[CGGGG(m<sup>8</sup>G)TTTTGGGCGGC]-3' (c); 5'-d[CGGGGGGTTTT(m<sup>8</sup>G)GGGCGGC]-3' (d); 5'-d[CGGGGGGTTTTGGG(m<sup>8</sup>G)GC]-3' (e); 5'-d[CG(m<sup>8</sup>G)GGGGTTTTGGGCGGC]-3' (f); in 2 mM sodium cacodylate buffer (pH 7.0) in the presence of 100 mM KCl at 25 °C (0.1 mM base concentration).
